# Supplementary material for: 131I-Evans blue: evaluation of necrosis targeting property and preliminary assessment of the mechanism in animal models
Source: PubMed Central journal article supplement — Acta Pharm Sin B. 2017 Sep 19;8(3):390–400. doi: 10.1016/j.apsb.2017.08.002 (PMC5989829; doi:10.1016/j.apsb.2017.08.002), 2017-09-19
Supplement: mmc1.pdf [file mmc1.pdf]

## Supporting Information

### Original article

# <sup>131</sup>I-Evans blue: evaluation of necrosis targeting property and preliminary assessment of the mechanism in animal models

Qiaomei Jin<sup>a,b,†</sup>, Xin Shan<sup>c,†</sup>, Qi Luo<sup>a,b,c</sup>, DongJian Zhang<sup>a,b</sup>, Yuanyu Zhao<sup>c</sup>, Nan Yao<sup>a,b</sup>, Fei Peng<sup>a,b</sup>, Dejian Huang<sup>a,b</sup>, Zhiqi Yin<sup>c</sup>, Wei Liu<sup>d,\*</sup>, Jian Zhang<sup>a,b,\*</sup>

<sup>a</sup>*Affiliated Hospital of Integrated Traditional Chinese and Western Medicine, Nanjing University of Chinese Medicine, Nanjing 210028, China*

<sup>b</sup>*Laboratories of Translational Medicine, Jiangsu Province Academy of Traditional Chinese Medicine, Nanjing 210028, China*

<sup>c</sup>*Department of Natural Medicinal Chemistry & Jiangsu Key Laboratory of Drug Screening, China Pharmaceutical University, Nanjing 210009, China*

<sup>d</sup>*Department of Nuclear Medicine, The First Affiliated Hospital of Nanjing Medical University, Nanjing 210029, China*

Received 16 May 2017; received in revised form 18 July 2017; accepted 5 August 2017

\*Corresponding authors. Tel.: +86 025 53262116 (Jian Zhang), +86 025 68136549 (Wei Liu).

E-mail addresses: [zhangjian@jsatcm.com](mailto:zhangjian@jsatcm.com) (Jian Zhang), [nuclearmedicine@163.com](mailto:nuclearmedicine@163.com) (Wei Liu).

†These authors made equal contributions to this work.

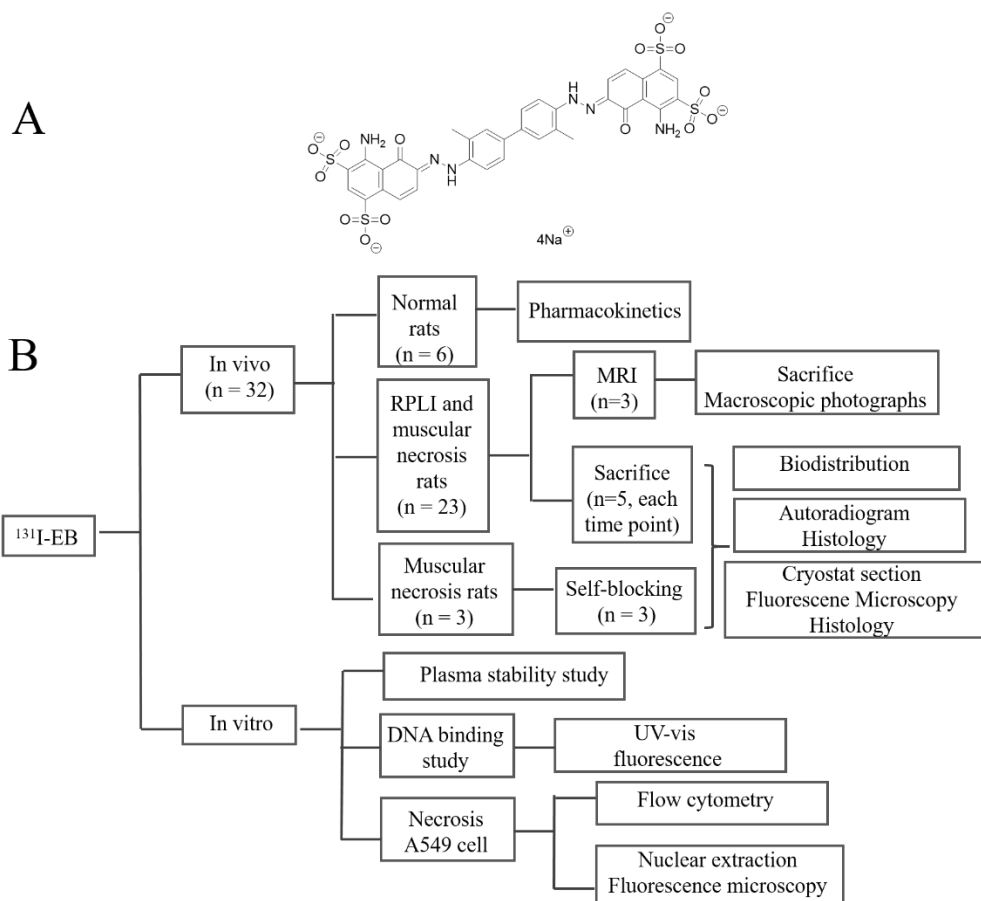

**Figure S1.** (A) Chemical structure of evans blue. (B) Flowchart of the experimental protocol.

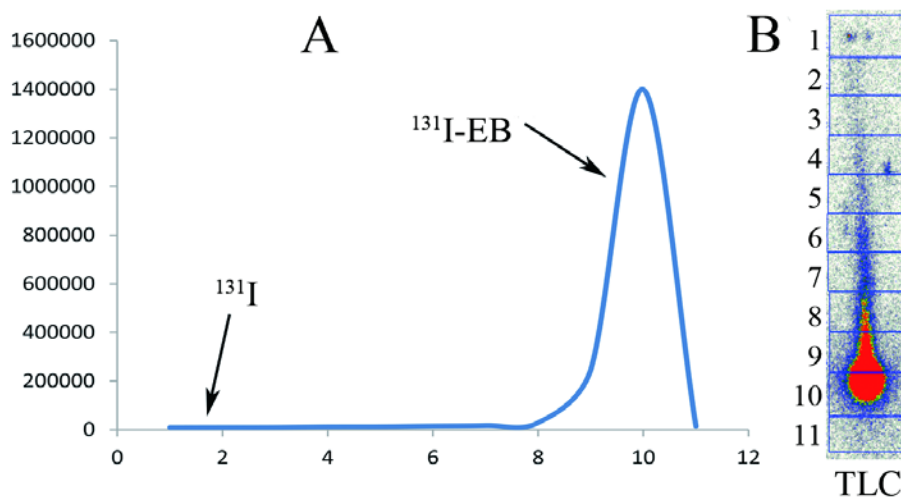

**Figure S2.** Thin layer chromatography (TLC) analysis with autoradiography of  $^{131}\text{I}$ -EB standard solution and the surplus stock EB in the reaction solution after labeling. Radiolabeling yields were  $> 95\%$  for  $^{131}\text{I}$ -EB as determined with TLC.

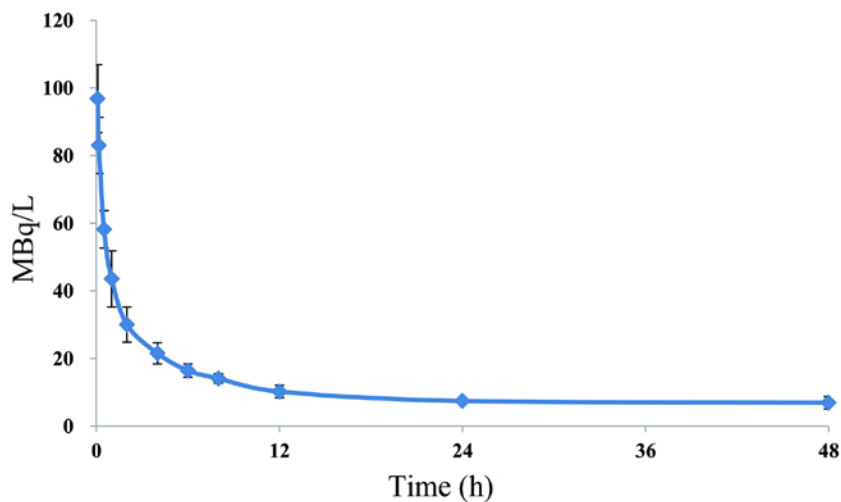

**Figure S3.** The plasma radioactive concentration–time profiles after i.v. bolus dose of 14.8 MBq/kg of  $^{131}\text{I}$ -EB in PBS solutions in healthy rats. Data are expressed as mean  $\pm$  SD,  $n = 6$ .

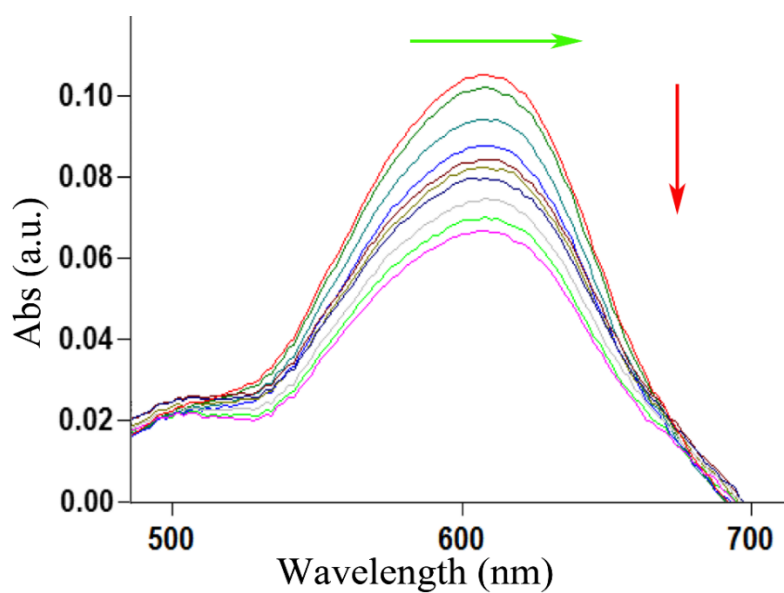

**Figure S4.** UV-Vis absorption spectra of EB in the absence and presence of increasing amount of CT-DNA. With the addition of CT-DNA, the above bands corresponding to EB showed significant hypochromism (red arrows) accompanied with a red shift (green arrows), indicating the interaction between EB and DNA.
